# Supplementary material for: Role of the Arabidopsis PIN6 Auxin Transporter in Auxin Homeostasis and Auxin-Mediated Development
Source: PLOS journal article supplement (doi:10.1371/journal.pone.0070069), 2013-07-29
Supplement: S3 (10.1371/journal.pone.0070069.s003) [file journal.pone.0070069.s003]

**Figure S3**

**A**

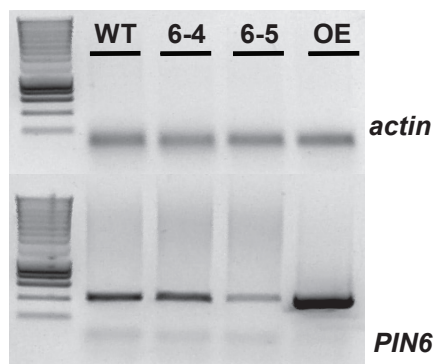

**B**

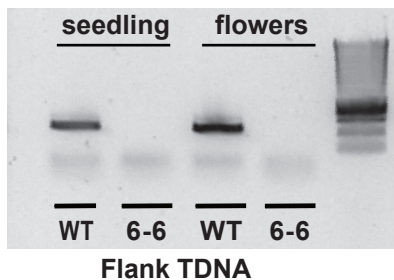

**C**

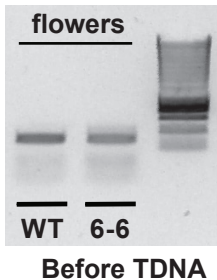

**D**

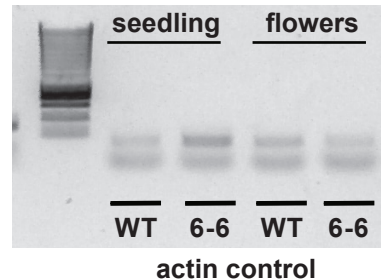

**Figure S3.** Characterisation of additional *pin6* mutant alleles. A) End-point PCR was used to quantify *PIN6* expression levels in 10 day old seedling tissues from TDNA insertion and overexpression lines. *pin6-5* showed slightly reduced *PIN6* mRNA levels, while OE#1 showed increased *PIN6* transcript levels. B) to D) RT-PCR was used to measure *PIN6* mRNA abundance in *pin6-6* seedling (10 DAG) and/or flowering tissues. PCR amplicons either flanked (B) or positioned before the GK\_711C09 TDNA insertion (C). D) ACTIN was used as a control to quantify cDNA.
